# Supplementary material for: CCN1-Mediated Signaling in Placental Villous Tissues after SARS-CoV-2 Infection in Term Pregnant Women: Implications for Dysregulated Angiogenesis
Source: MDPI journal article supplement (doi:10.3390/cimb46040221), 2024-04-18
Supplement: s1 [file s1]

## Supplementary material: Ma, Duan et al.

**Supplementary Table S1.** Antibodies used for immunoblotting

| Antigen                   | Species raised in | Company (Catalog No.)              | Dilution |
|---------------------------|-------------------|------------------------------------|----------|
| <b>Primary antibody</b>   |                   |                                    |          |
| Flt-1                     | Rabbit            | Santa Cruz Biotechnology (sc-316)  | 1:1000   |
| Endoglin                  | Goat              | R & D systems (AF1097)             | 1:1000   |
| CCN1                      | Rabbit            | Novus (NB100-356)                  | 1:500    |
| eNOS                      | Rabbit            | Cell Signaling Technology (32027s) | 1:1000   |
| TGF $\beta$ R1            | Rabbit            | Santa Cruz Technology (sc-398)     | 1:500    |
| Phospho-NF- $\kappa$ B    | Rabbit            | Cell Signaling Technology (3033s)  | 1:1000   |
| NF- $\kappa$ B            | Rabbit            | Santa Cruz Technology (sc-372)     | 1:1000   |
| $\beta$ -Actin            | Mouse             | Sigma (A3854)                      | 1:200000 |
| <b>Secondary antibody</b> |                   |                                    |          |
| Rabbit, HRP               | Goat              | Invitrogen (G21234)                | 1:5000   |
| Goat, HRP                 | Donkey            | Invitrogen (A15999)                | 1:5000   |

**Supplementary Table S2.** Antibodies used for immunohistochemical/immune-fluorescence staining

| Antigen                 | Species raised in | Company (Catalog No.)             | Dilution |
|-------------------------|-------------------|-----------------------------------|----------|
| <b>Primary antibody</b> |                   |                                   |          |
| CCN1                    | Rabbit            | Novus (NB100-356)                 | 1:30     |
| Flt-1                   | Rabbit            | Santa Cruz Biotechnology (sc-316) | 1:50     |

|          |        |                                    |       |
|----------|--------|------------------------------------|-------|
| Endoglin | Goat   | R & D systems (AF1097)             | 1:50  |
| CD31     | Mouse  | Dako (M0823)                       | 1:40  |
| CK7      | Mouse  | Novus (NBP1-22539)                 | 1:80  |
| eNOS     | Rabbit | Cell Signaling Technology (32027s) | 1:100 |
| TGFβR1   | Rabbit | Santa Cruz Technology (sc-398)     | 1:50  |

#### Secondary antibody

|                  |        |                            |       |
|------------------|--------|----------------------------|-------|
| Rabbit Alexa-488 | Donkey | Abcam (ab150073)           | 1:200 |
| Mouse Cy3        | Goat   | Life Technologies (A10521) | 1:200 |
| Goat Alexa-488   | Donkey | Life Technologies (A11055) | 1:200 |
| Rabbit, HRP      | Goat   | Invitrogen (G21234)        | 1:100 |

#### Supplementary Table S3. SARS-CoV-2 infected vs. non-infected pregnancies:

patient cohort for angiogenic protein analysis

| Variable                                               | Control (n=14)      | SARS-CoV-2 (n=14)   | P-value |
|--------------------------------------------------------|---------------------|---------------------|---------|
| Maternal age at delivery, years, median (IQR)          | 31.50 (26.00-35.25) | 32.50 (25.75-35.25) | 0.7743  |
| Gestational age at sampling, weeks, mean (min and max) | 31+5 (28+0-38+5)    | 38+2 (36+1-41+1)    | <0.0001 |
| Gestational age at delivery, weeks, mean (min and max) | 37+2 (30+1-40+5)    | 38+5 (36+5-41+1)    | 0.1464  |
| Pregnancy BMI before birth, median (IQR)               | 32.00 (23.75-38.25) | 30.00 (27.00-32.00) | 0.6817  |
| Cesarean section, no. (%)                              | 7 (50.00)           | 7 (50.00)           | -       |
| Leukocyte, 10 <sup>3</sup> /mm <sup>3</sup> , mean ±   | 12.28 ± 6.68        | 8.22 ± 2.33         | 0.0421  |

|                                       |                      |                   |        |
|---------------------------------------|----------------------|-------------------|--------|
| SD                                    |                      |                   |        |
| CRP, mg/dL, mean $\pm$ SD             | 0.58 $\pm$ 0.96      | 1.20 $\pm$ 1.49   | 0.4471 |
| Asymptomatic infection, no. (%)       | -                    | 8 (57.14)         | -      |
| Mild infection, no. (%)               | -                    | 6 (42.86)         | -      |
| Birth weight, g, mean $\pm$ SD        | 3034.00 $\pm$ 664.40 | 3264 $\pm$ 444.70 | 0.2909 |
| 5-min Apgar score, mean (min and max) | 9.14 (7-10)          | 9.24 (8-10)       | 0.4231 |

**Supplementary Figure S1.** Flt-1 and Endoglin were increased in placental villous tissue of SARS-CoV-2 infected women

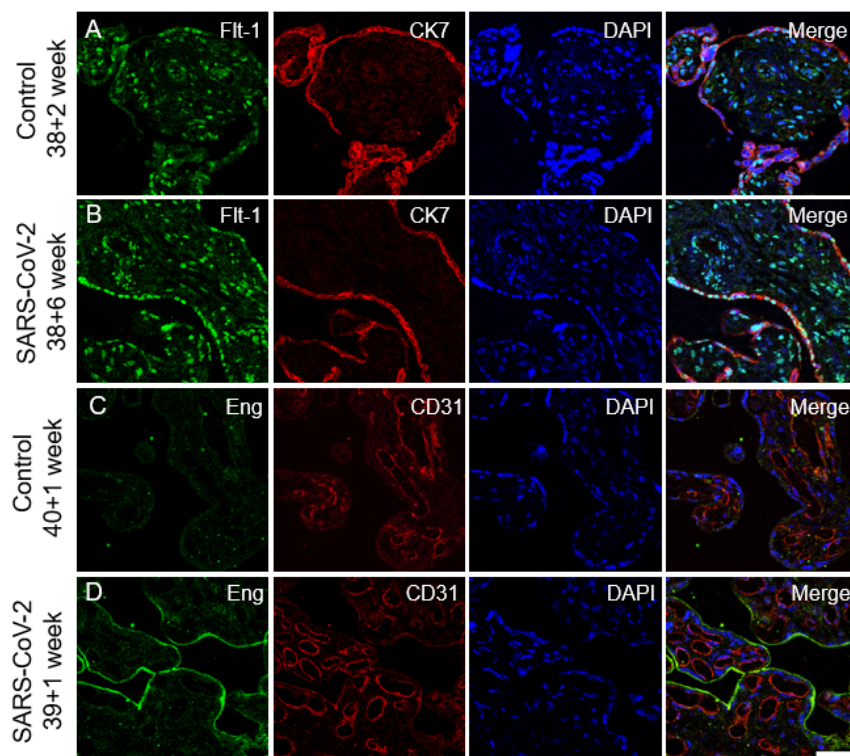

**Supplementary Figure S1**

Localization of Flt-1 and Endoglin in placental villi of pregnant women with and without SARS-Cov-2. (A-B) Double immunofluorescence staining of Flt-1 and CD31 on placental villus tissue. (C-D) Double immunofluorescence staining of Eng and CK7

on placental villus tissue. Scale bar: 50  $\mu$ m.

## **Supplementary materials and methods**

### **1. Placental tissue preparation**

Placentas were processed within 4 hours of delivery. The chorionic villous tissue was collected and processed as detailed described [36]. A placental lobule located between the umbilical cord and the edge of the placenta was selected as a middle part, cut with scissors, placed in a culture dish and washed with 1xPBS 3-5 times to remove blood until the washing solution was clear. The decidua basalis and chorionic villous tissue were separated with scissors and tweezers, removing blood vessels and calcifications, then washed again 2-3 times with 1xPBS. Finally, the chorionic villous tissue was frozen at -80°C before used for protein and RNA extraction.

The placental tissue used to perform paraffin sections was processed according to the following procedure. The tissue blocks were fixed with 4% paraformaldehyde then embedded in paraffin. Paraffin-embedded tissues were cut into overnight, 5 $\mu$ m sections for histological staining.

### **2. Cell culture and CCN1 treatment**

The trophoblast cell line SGHPL-5 was obtained from the Division of Basic Medical Sciences, St George's University of London (kindly provided by G. Whitley). Cells were routinely cultivated in nutrient mixture F-10 Ham's medium (Sigma, N6908) supplemented with 10% fetal bovine serum (FBS; Gibco, 16000-044), 2mM L-glutamine (Sigma, G8540), 100 U/ml penicillin and 100 $\mu$ g/ml streptomycin (Sigma,

P7539) at 37°C with 5% CO<sub>2</sub>. Cells were treated with recombinant human CCN1 (R&D, 4055-CR) at a concentration ranging from 250 to 1000 ng/ml for 24 h.

SGHPL-5 cells were seeded in 6-well plates, changed to serum-free medium before treated with recombinant CCN1. After 24 hours of incubation with CCN1, the supernatant was collected. Suspended cells were removed by centrifuging at 1000 rpm for 10 minutes at 4°C. The medium was subsequently concentrated using centrifugal filter units (Amicon Ultra, UFC500324) according to the manufacturer's instructions. The samples were stored at -80°C until further use.

### **3. H&E staining**

Randomly selected 5 µm placenta sections were stained with a routine hematoxylin and eosin (H&E) stain to verify pathological alterations. Stained sections were scanned by the Aperio CS2 ScanScope slide scanner (Leica, Wetzlar, Germany) at 40×. The acquired files were converted to TIFF format images by Aperio ImageScope (Version 12.4.6.5003, Leica).

### **4. Quantitative polymerase chain reaction (q-PCR)**

The total RNA was extracted from 20mg human placenta tissue using the RNeasy Plus Mini Kit (QIAGEN, 74134) following the manufacturer's protocol. Complementary DNA (cDNA) was synthesized with 1µg RNA as previously described [60]. Relative CCN1 expression levels were quantitated using the qPCR Master Mix SYBR Green (Affymetrix, Santa Clara, USA) and analyzed by an ABI Prism 7300 sequence detector (Applied Biosystems, Foster City, USA) as described before [61]. Relative mRNA expression was determined by standard curve evaluation, normalized to the mean level

of HPRT1 as the housekeeping gene. The following primer sequences were used: CCN1, forward 5'- GTGACGAGGATAGTATCAAGGACC-3', reverse 5'-GTTGGGAAAT GTTCCGGTCTTTA-3'; HPRT1, forward 5'-ACCAGTCAACAGGGGACATAA-3', reverse 5'-AAGCTTGCGACCTTGACC-3'.

## **5. Collection of Blood Samples and measurement of sFlt-1, PLGF and sEng**

Patient blood samples were collected and stored at 4°C within 4 hours to prevent hemolysis. Subsequently, the samples were centrifuged at 2500×g for 10 minutes. Following centrifugation, three to four milliliters of serum were collected then stored at -80°C.

The levels of sFlt-1 and PlGF were quantified using specific Enzyme-Linked immunosorbent assay (ELISA) kits: sFlt-1 (Thermo Fisher Scientific, 845.075) and PlGF-plus (Thermo Fisher Scientific, 859.075), respectively. The measurements were performed on the BRAHMS KRYPTOR compact PLUS machine based on TRACE® Technology (Time-Resolved Amplified Cryptate Emission) (Thermo Fischer Scientific, BRAHMS GmbH, Hennigsdorf, Germany), following the manufacturer's protocol. The measurement of sEng was performed using the Endoglin ELISA kit (R&D Systems, DNDG00), following routine ELISA procedures and the manufacturer's instructions. The detection limit for sFlt-1 was 22 pg/ml, and for PlGF, 3.6 pg/ml. The minimum detectable concentration of sEng was consistently below 0.030 ng/ml. Further details are shown [62].
